# Supplementary material for: A luminescent Cd(ii) coordination polymer as a multi-responsive fluorescent sensor for Zn2+, Fe3+ and Cr2O72− in water with fluorescence enhancement or quenching
Source: Royal Society of Chemistry journal article supplement (doi:10.1039/d0ra10203b), 2021-01-01
Supplement: d0ra10203b1.pdf [file d0ra10203b1.pdf]

# **A luminescent Cd(II) coordination polymer as a multi-responsive fluorescent sensor for Zn<sup>2+</sup>, Fe<sup>3+</sup> and Cr<sub>2</sub>O<sub>7</sub><sup>2-</sup> in water with fluorescence enhancement or quenching**

Liangjuan Liu,<sup>a</sup> Yungen Ran,<sup>b</sup> Jianlong Du,<sup>c</sup> Zhichao Wang,<sup>a</sup> Mei Liu,<sup>a</sup> Yajuan Mu,<sup>\*a</sup>

<sup>a</sup> *College of Traditional Chinese Medicine, Hebei University, Baoding, 071000, P. R. China*

<sup>b</sup> *College of Life Science, Hebei University, Baoding, 071000, P. R. China*

<sup>c</sup> *College of Chemistry & Environmental Science, Hebei University, Baoding, 071000, P. R. China*

---

\* Corresponding author. E-mail: [muyjhbu@hbu.edu.cn](mailto:muyjhbu@hbu.edu.cn)

|                                                                                                                                                                                      |                |
|--------------------------------------------------------------------------------------------------------------------------------------------------------------------------------------|----------------|
| <b>Section 1.</b> Synthesis of the ligand H <sub>2</sub> btc.                                                                                                                        | <b>Page 3</b>  |
| <b>Figure S1.</b> Experimental (red) and simulated (black) PXRD patterns of CP-1.                                                                                                    | <b>Page 4</b>  |
| <b>Figure S2.</b> PXRD patterns of the as-synthesized CP-1, the simulated one and the samples after immersion in different solvents.                                                 | <b>Page 5</b>  |
| <b>Figure S3.</b> TGA curve of CP-1.                                                                                                                                                 | <b>Page 6</b>  |
| <b>Figure S4.</b> Solid-state photoluminescent spectra of free ligands and CP-1 at room temperature.                                                                                 | <b>Page 7</b>  |
| <b>Figure S5.</b> PXRD patterns of the simulated pattern (Black), experimental pattern (Red), and the sample of CP-1 after Zn <sup>2+</sup> test (Blue).                             | <b>Page 8</b>  |
| <b>Figure S6.</b> N 1s and S 2p XPS spectra of CP-1 (black) and Zn <sup>2+</sup> -incorporated CP-1 (red) activated by 0.001 mol/L aqueous solution of Zn <sup>2+</sup> .            | <b>Page 9</b>  |
| <b>Figure S7.</b> PXRD patterns of the simulated pattern (Black), experimental pattern (Red), and the sample of CP-1 after Fe <sup>3+</sup> test (Blue).                             | <b>Page 10</b> |
| <b>Figure S8.</b> PXRD patterns of the simulated pattern (Black), experimental pattern (Red), and the sample of CP-1 after Cr <sub>2</sub> O <sub>7</sub> <sup>2-</sup> test (Blue). | <b>Page 11</b> |
| <b>Figure S9.</b> UV-vis absorption spectra of varied metal ions and the emission spectra of CP-1 in water.                                                                          | <b>Page 12</b> |
| <b>Figure S10.</b> UV-vis absorption spectra of varied anions and the emission spectra of CP-1 in water.                                                                             | <b>Page 13</b> |

## Section 1. Synthesis of the ligand H<sub>2</sub>btic.

3,5-dimethylbenzoic acid (7.50 g, 0.05 mol), 2-aminothiophenol (6.76 g, 0.05 mol) and polyphosphoric acid (PPA) (150 mL) was added to a 500mL round bottomed flask. Under the nitrogen atmosphere, the mixture was heated at 200°C for 24 h. The reaction solution was poured into water. The crude precipitate was filtered off and washed with water with 0.1 M Na<sub>2</sub>CO<sub>3</sub>, then washed with water, finally recrystallized from ethanol. The obtained product (11.96 g, 0.05 mol) and KMnO<sub>4</sub> (7.90 g, 0.05 mol) were dissolved in 350 mL of a mixed solvent of pyridine/water (1/1). The reaction was heated at 90°C for 24 h. The solution was filtered to eliminate the by-product MnO<sub>2</sub>. The remaining clear solution was acidized to pH = 3 with 2 M HCl. The resulting precipitate was dissolved in 1 M NaOH and reprecipitated by acidification to pH = 3 with 1 M HCl. The precipitate was filtered off, washed with water and dried to afford H<sub>2</sub>btic as white solid. The reaction route is shown in Scheme S1. <sup>1</sup>H NMR (400MHz, DMSO-*d*<sub>6</sub>): δ 13.698 (s, 2H), 8.784 (s, 2H), 8.601 (s, 1H), 8.227 (d, 1H), 8.195 (d, 1H), 7.620(m, 2H).

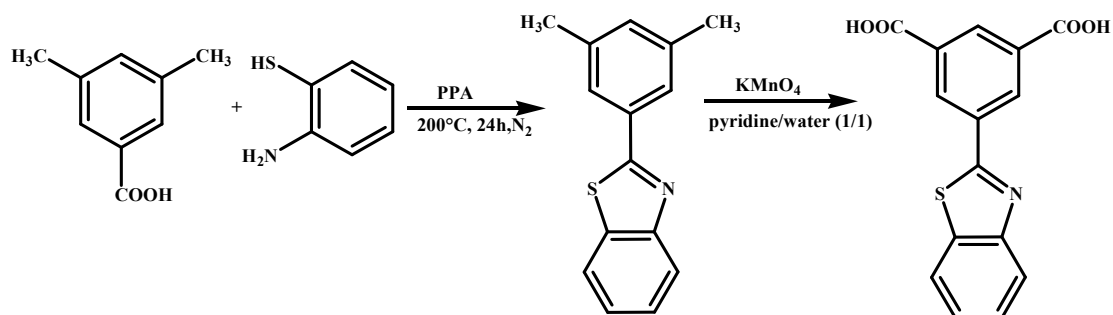

Scheme S1. The synthesis of ligand H<sub>2</sub>btic.

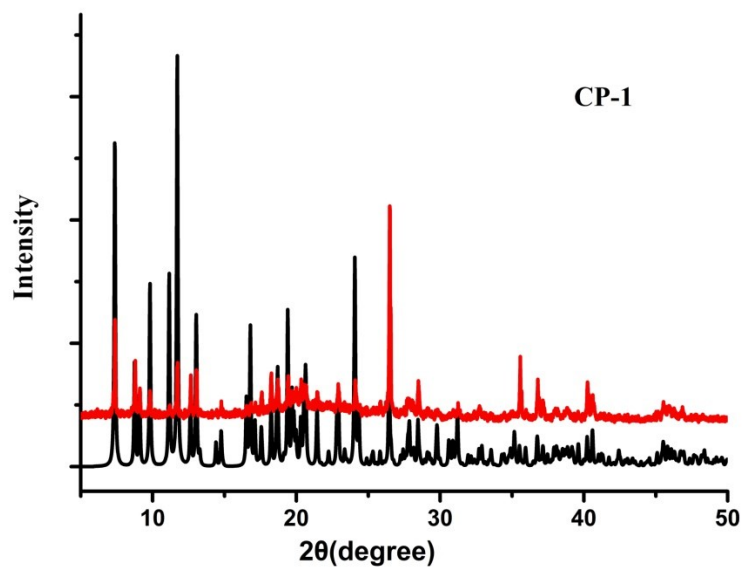

**Figure S1.** Experimental (red) and simulated (black) PXR D patterns of CP-1.

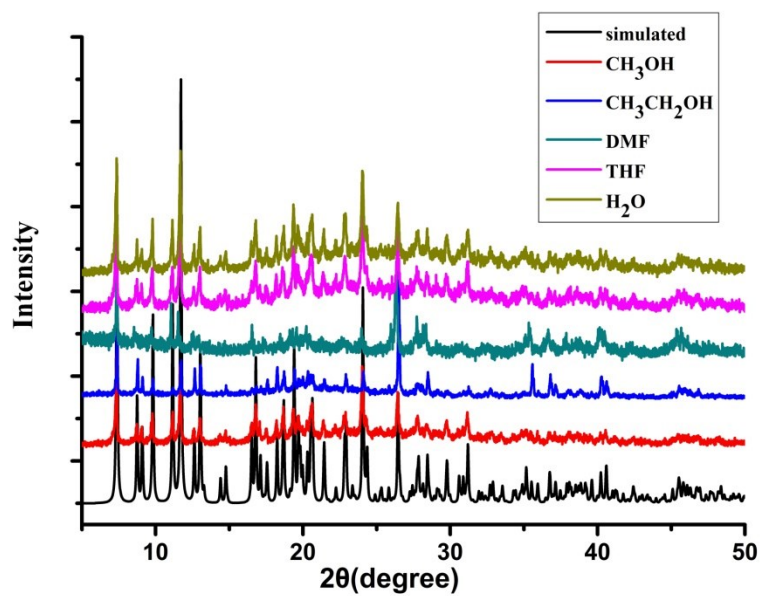

**Figure S2.** PXR D patterns of the as-synthesized CP-1, the simulated one and the samples after immersion in different solvents.

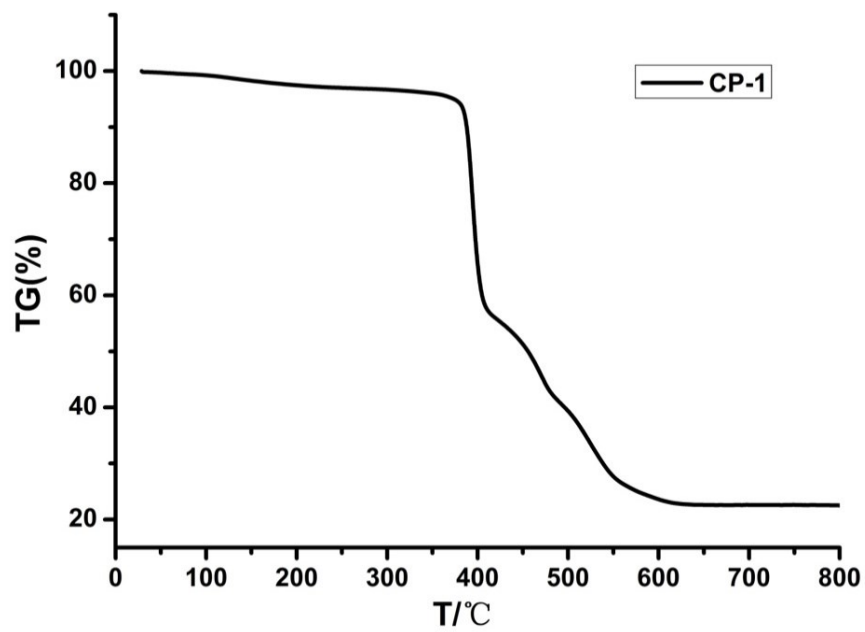

**Figure S3.** TGA curve of CP-1.

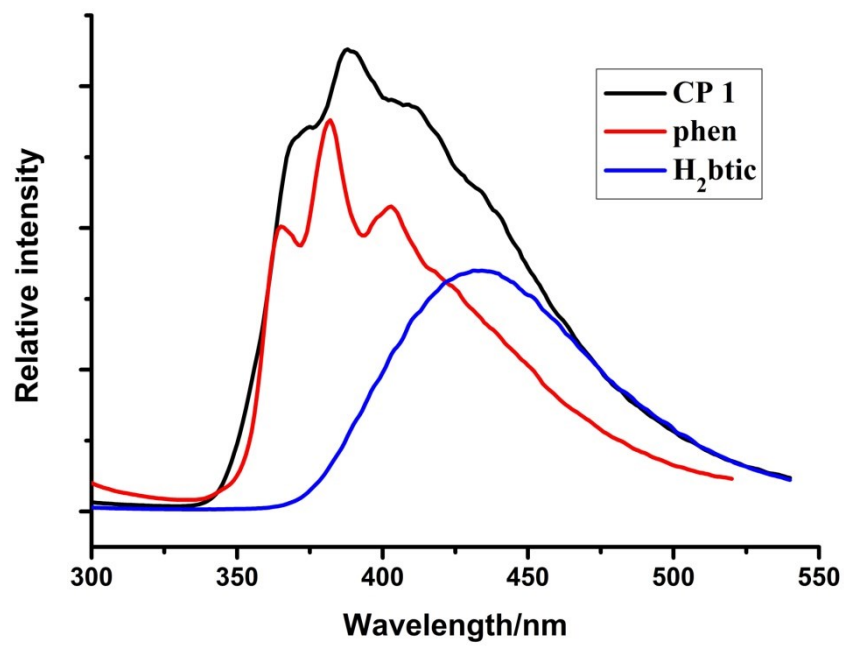

**Figure S4.** Solid-state photoluminescent spectra of free ligands and CP-1 at room temperature.

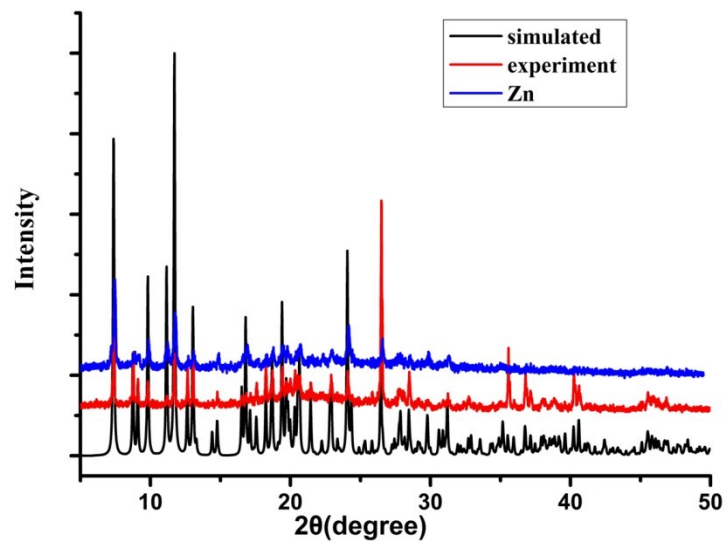

**Figure S5.** PXRD patterns of the simulated pattern (Black), experimental pattern (Red), and the sample of CP-1 after Zn<sup>2+</sup> test (Blue).



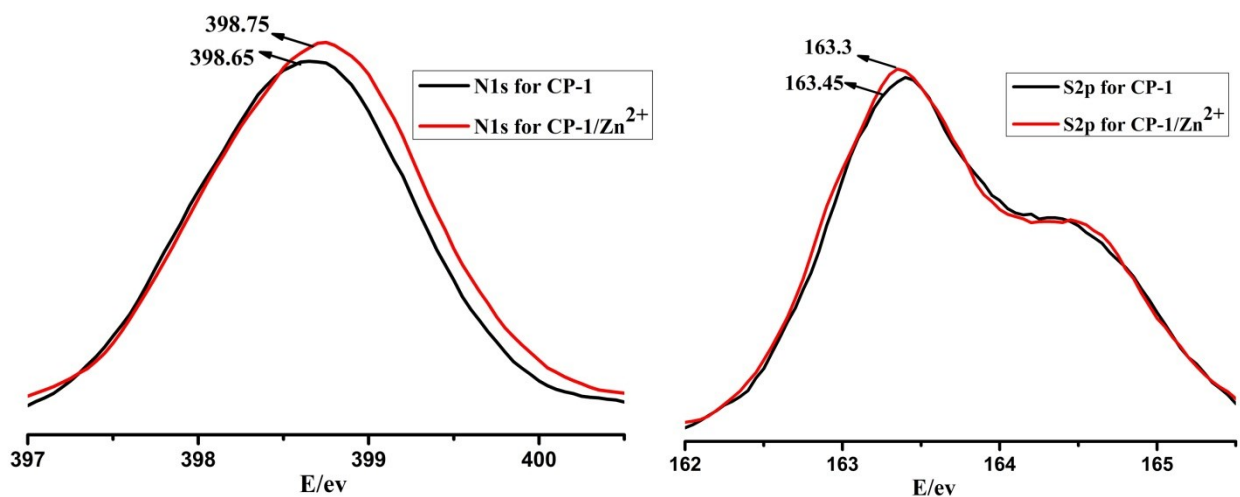

**Figure S6.** N 1s and S 2p XPS spectra of CP-1 (black) and Zn<sup>2+</sup>-incorporated CP-1 (red) activated by 0.001 mol/L aqueous solution of Zn<sup>2+</sup>.

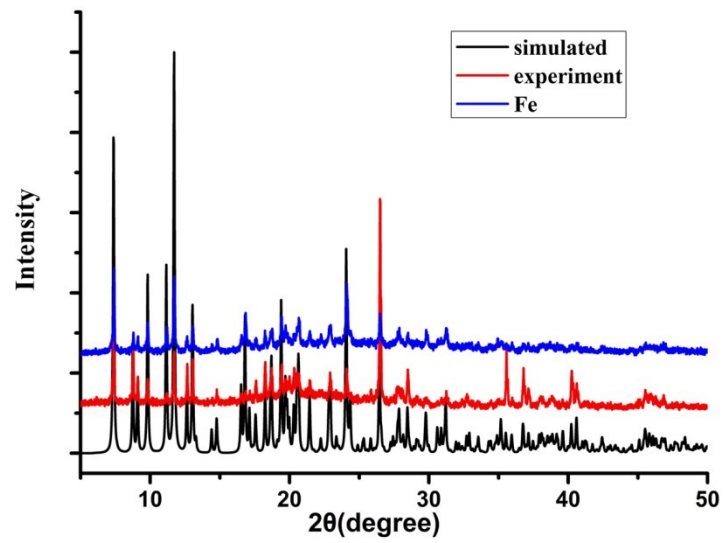

**Figure S7.** PXRD patterns of the simulated pattern (Black), experimental pattern (Red), and the sample of CP-1 after Fe<sup>3+</sup> test (Blue).

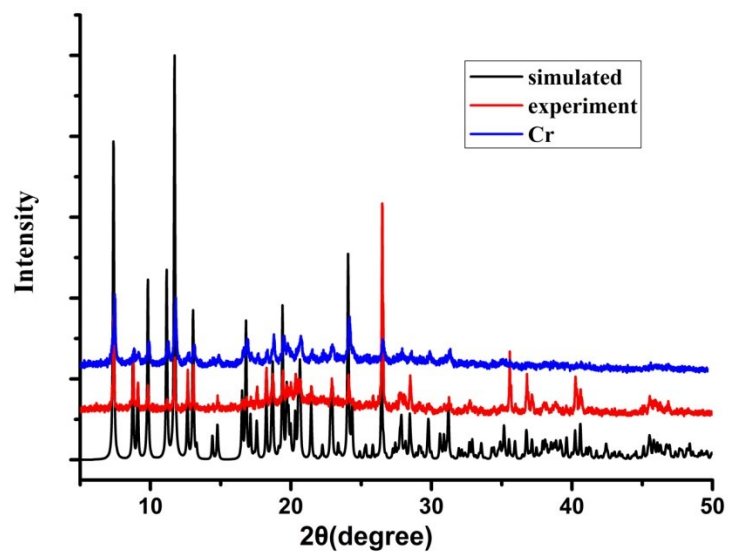

**Figure S8.** PXRD patterns of the simulated pattern (Black), experimental pattern (Red), and the sample of CP-1 after  $\text{Cr}_2\text{O}_7^{2-}$  test (Blue).

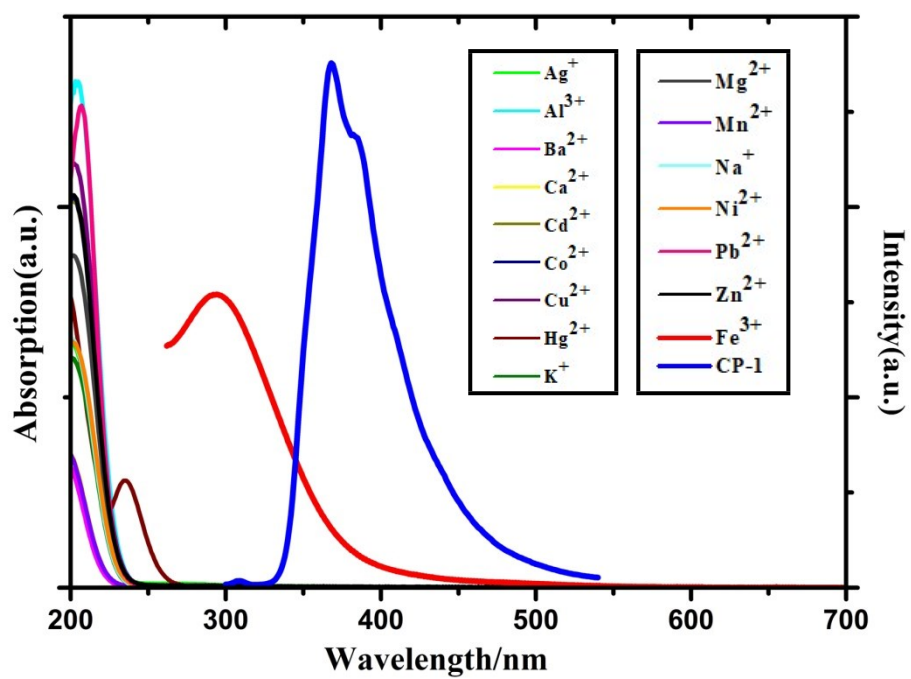

Figure  
S9. UV-  
vis

absorption spectra of varied metal ions and the emission spectra of CP-1 in water.

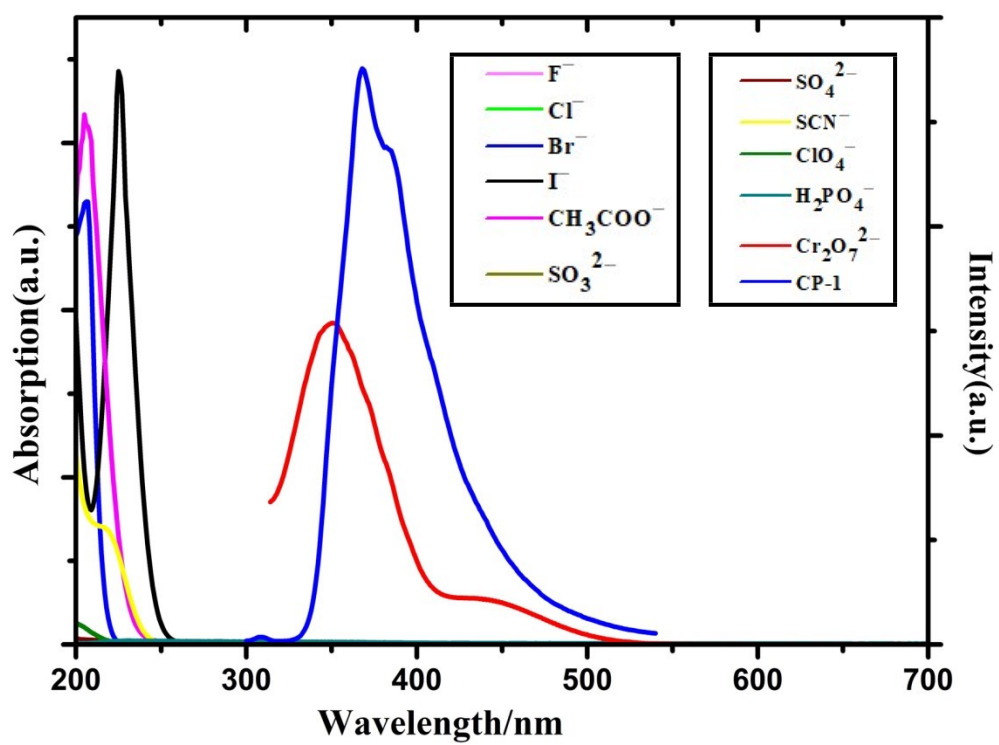

Figure  
S10.  
UV-vis

absorption spectra of varied anions and the emission spectra of CP-1 in water.
